# Supplementary material for: LuminoCell: a versatile and affordable luminometer platform for monitoring in-cell luciferase-based reporters
Source: bioRxiv or medRxiv preprint supplement (doi:10.1101/2022.01.28.478134), 2022-01-28
Supplement: Supplementary file [file media-1.pdf]

**Supplementary information for article: LuminoCell: a versatile and affordable luminometer platform for monitoring in-cell luciferase-based reporters by Weissová et al.**

**Supplementary Figures**

**Supplementary Figure 1**

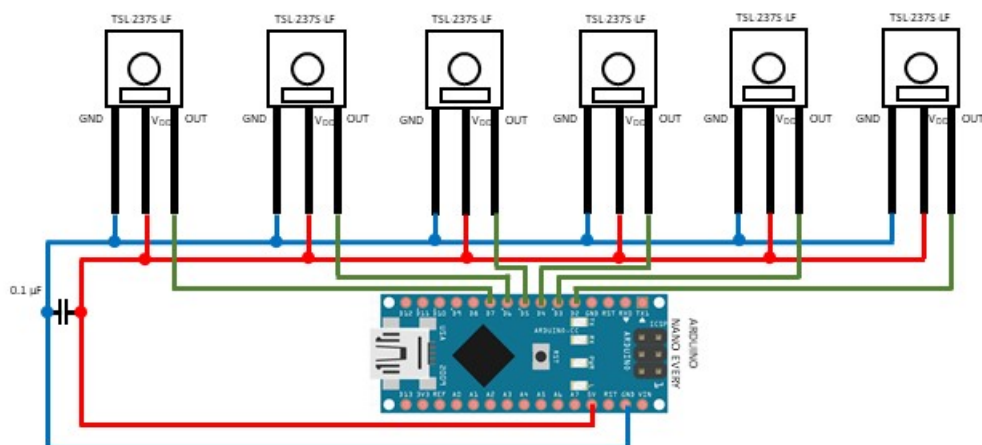

**Figure S1:** Wiring diagram of the LuminoCell device

**Supplementary Figure 2**

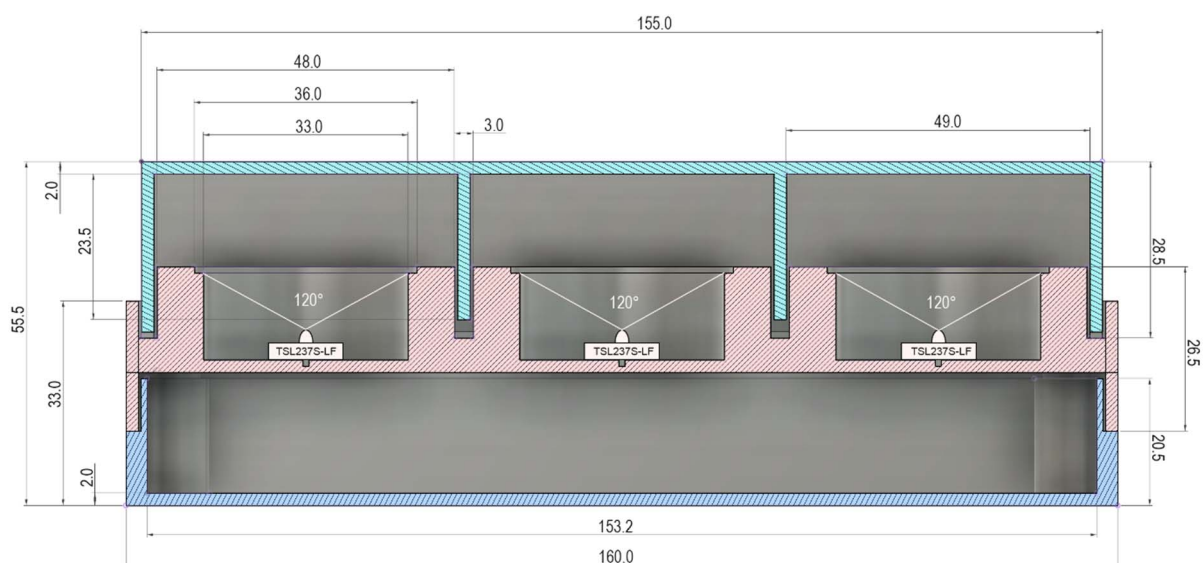

**Figure S2:** Cross section of the LuminoCell. Dimensions are given in millimetres.

### Supplementary Figure 3

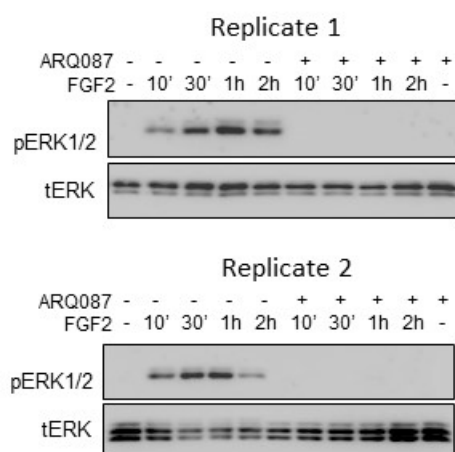

**Figure S3:** Western blot analysis of ERK phosphorylation (p) in RCS::pKrox24<sup>Luc</sup> cells treated with 500 nM ARQ087 and 20 ng/ml FGF2. Total levels of ERK (t) represent a loading control.

### Supplementary Figure 4

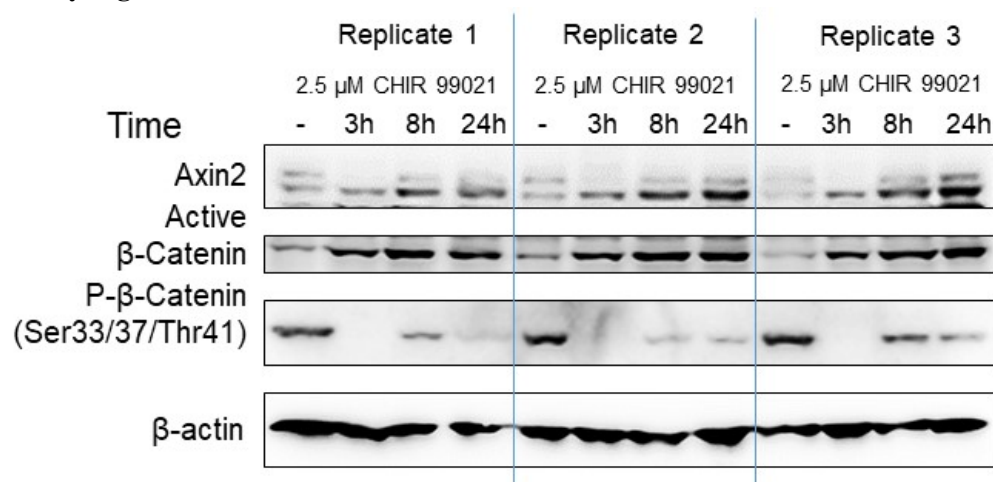

**Figure S4:** Western blot analysis of β-catenin and Axin2 expression in STF cells, β-actin represents a loading control.

### Supplementary Figure 5

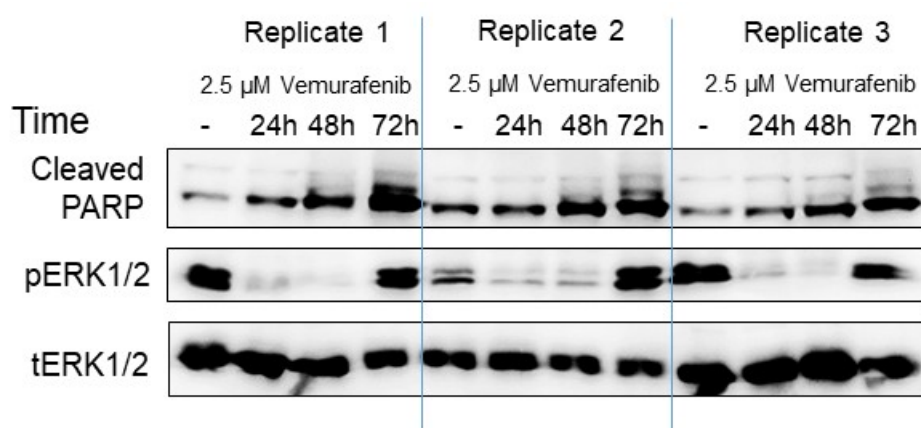

**Figure S5:** Western blot analysis of PARP cleavage and ERK (p) phosphorylation. Total (t) ERK represents a loading control.

### Supplementary Figure 6

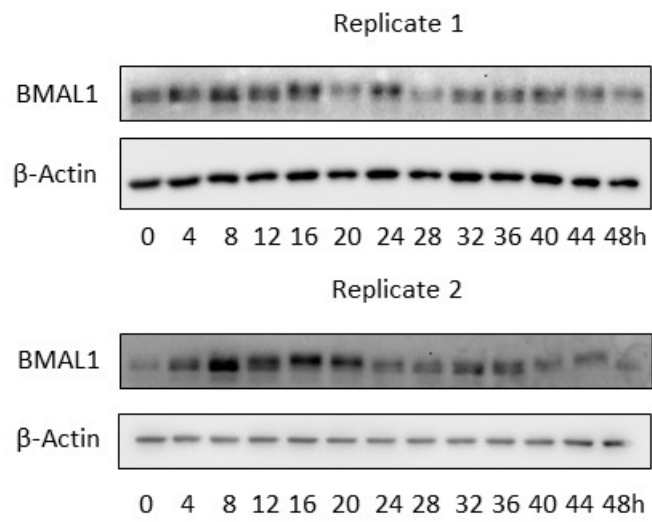

**Figure S6:** Western blot analysis of BMAL1 expression in hDF upon serum shock treatment,  $\beta$ -actin represents a loading control.

## Supplementary Tables

**Supplementary Table 1**

| Costs to build the LuminoCell |                         |             |
|-------------------------------|-------------------------|-------------|
| Quantity                      | Part                    | Price (USD) |
| 6x                            | TSL237S-LF              | 24          |
| 1x                            | Arduino Nano Every      | 11          |
| 1x                            | Capacitor (0.1 $\mu$ F) | 0.1         |
| 1x                            | USB cable               | 4           |
| <b>Estimated total costs</b>  |                         | <b>39.1</b> |

**Table S1:** Summary of costs to build the LuminoCell. Costs for 3D printed case are not included.

**Supplementary Table 2**

| List of primary antibodies used for Western blot analysis |                  |                           |
|-----------------------------------------------------------|------------------|---------------------------|
| Name                                                      | Catalogue Number | Manufacturer              |
| Axin2                                                     | 2151             | Cell Signaling Technology |
| $\beta$ -Catenin                                          | 05-665           | Merck                     |
| Phospho- $\beta$ -Catenin (Ser33/37/Thr41)                | 9561             | Cell Signaling Technology |
| $\beta$ -Actin                                            | 4970             | Cell Signaling Technology |
| Cleaved PARP                                              | 9541             | Cell Signaling Technology |
| pERK1/2                                                   | 9101             | Cell Signaling Technology |
| tERK1/2                                                   | 4695             | Cell Signaling Technology |
| BMAL1                                                     | ab93806          | Abcam                     |

**Table S2:** Summary of primary antibodies used in this study.
